# Supplementary material for: Effectiveness of Progressive Resistive Exercise (PRE) in the context of HIV: systematic review and meta-analysis using the Cochrane Collaboration protocol
Source: PubMed Central journal article supplement (PMC5389006; doi:10.1186/s12879-017-2342-8), 2017-04-12
Supplement: 12879_2017_2342_MOESM4_ESM.pdf [file 12879_2017_2342_MOESM4_ESM.pdf]

**Additional File 4 - GRADE Summary of Finding Table: Progressive Resistive Exercise (PRE) or Combined Progressive Resistive Exercise (PRE) and Aerobic Exercise Compared with No Exercise for Adults Living with HIV**

| Outcomes                                                            | Anticipated absolute effects (95% CI)                                      |                                                                                                                             | Number of Participants (studies) | Quality of the evidence (GRADE) | Comments                                                                                                                                                                                  |
|---------------------------------------------------------------------|----------------------------------------------------------------------------|-----------------------------------------------------------------------------------------------------------------------------|----------------------------------|---------------------------------|-------------------------------------------------------------------------------------------------------------------------------------------------------------------------------------------|
|                                                                     | Risk with No Exercise                                                      | Risk with PRE or Combined PRE and Aerobic Exercise Compared with No Exercise                                                |                                  |                                 |                                                                                                                                                                                           |
| <b>IMMUNOLOGICAL / VIROLOGICAL Viral Load (log10copies)</b>         | The mean Viral Load (log10copies) in the control group was 0               | The mean Viral Load (log10copies) in the intervention group was 0.12 log10copies higher (0.23 lower to 0.46 higher)         | 99 (4 RCTs)                      | ⊕⊕⊕⊖<br>MODERATE                | No significant difference in change in viral load between groups.                                                                                                                         |
| <b>CARDIORESPIRATORY VO2 Max (ml/kg/min)</b>                        | The mean VO2max (ml/kg/min) in the control group was 0                     | The mean VO2 max (ml/kg/min) in the intervention group was 3.71 ml/kg/min higher (1.73 higher to 5.70 higher)               | 82 (3 RCTs)                      | ⊕⊕⊕⊖<br>MODERATE                | <b>*Significant improvement in VO2max among exercisers compared with non-exercisers.</b><br><br>^Estimate suggests a potential clinically important improvement in VO2max.                |
| <b>STRENGTH Upper Body - Chest Press (1 repetition maximum; kg)</b> | The mean Chest Press (1 repetition maximum; kg) in the control group was 0 | The mean Chest Press (1 repetition maximum; kg) in the intervention group was 11.86 kg higher (2.37 higher to 21.36 higher) | 44 (2 RCTs)                      | ⊕⊕⊖⊖<br>LOW                     | <b>*Significant improvement in upper body strength among exercisers compared with non-exercisers.</b><br><br>^Estimate suggests a potential clinically important improvement in strength. |

|                                                                             |                                                                          |                                                                                                                                       |                 |                  |                                                                                                                                                                                                  |
|-----------------------------------------------------------------------------|--------------------------------------------------------------------------|---------------------------------------------------------------------------------------------------------------------------------------|-----------------|------------------|--------------------------------------------------------------------------------------------------------------------------------------------------------------------------------------------------|
| <b>STRENGTH</b><br><b>Lower Body - Leg Press (1 repetition maximum; kg)</b> | The mean Leg Press (1 repetition maximum; kg) in the control group was 0 | The mean Leg Press (1 repetition maximum; kg) in the intervention group was 50.96 kg higher (13.01 lower to 114.92 higher)            | 44<br>(2 RCTs)  | ⊕⊖⊖⊖<br>VERY LOW | No significant difference between groups, but a trend towards an improvement in lower body strength among exercisers compared with non-exercisers.                                               |
| <b>WEIGHT</b><br><b>Body Weight (kg)</b>                                    | The mean Body Weight (kg) in the control group was 0                     | The mean Body Weight (kg) in the intervention group was 2.5 kg higher (0.32 higher to 4.67 higher)                                    | 129<br>(5 RCTs) | ⊕⊖⊖⊖<br>VERY LOW | <b>*Significant increase in body weight among exercisers compared with non-exercisers. Increase in body weight interpreted as a favourable outcome as reflection of increase in muscle mass.</b> |
| <b>BODY COMPOSITION</b><br><b>Body Mass Index (kg/m<sup>2</sup>)</b>        | The mean Body Mass Index (kg/m <sup>2</sup> ) in the control group was 0 | The mean Body Mass Index (kg/m <sup>2</sup> ) in the intervention group was 0.40 kg/m <sup>2</sup> higher (0.22 lower to 1.03 higher) | 131<br>(5 RCTs) | ⊕⊕⊕⊖<br>MODERATE | No significant difference in change in body mass index between groups.                                                                                                                           |
| <b>BODY COMPOSITION</b><br><b>Fat Mass (kg)</b>                             | The mean Fat Mass (kg) in the control group was 0                        | The mean Fat Mass (kg) in the intervention group was 0.36 kg higher (0.5 lower to 1.23 higher)                                        | 103<br>(4 RCTs) | ⊕⊕⊕⊖<br>MODERATE | No significant difference in change in fat mass between groups.                                                                                                                                  |

**LEGEND:** \*Bold and asterisk text in the comments section indicates significant increase/improvement for the outcome. Increases in strength and body weight were considered favourable outcomes with exercise. ^Estimate suggests a potential clinically important change in outcome.

**GRADE Working Group grades of evidence**

**High quality:** We are very confident that the true effect lies close to that of the estimate of the effect.

**Moderate quality:** We are moderately confident in the effect estimate: The true effect is likely to be close to the estimate of the effect, but there is a possibility that it is substantially different.

**Low quality:** Our confidence in the effect estimate is limited: The true effect may be substantially different from the estimate of the effect.

**Very low quality:** We have very little confidence in the effect estimate: The true effect is likely to be substantially different from the estimate of effect.
